# Supplementary material for: Investigation of nano-sized Cu(ii)O as a high capacity conversion material for Li-metal cells and lithium-ion full cells
Source: Royal Society of Chemistry journal article supplement (doi:10.1039/c6ta10944f), 2017-01-01
Supplement: c6ta10944f1.pdf [file c6ta10944f1.pdf]

## Supporting Information

**Title:** Investigation of Nano-Sized Cu(II)O As a High Capacity Conversion Material for Li Metal Cells and Lithium Ion Full Cells

*Yunxian Qian, Philip Niehoff, Dong Zhou, Robert Adam, Daria Mikhailova, Marcelina Pyschik, Markus Börner, Richard Klöpsch, David Rafaja, Gerhard Schumacher, Martin Winter, Helmut Ehrenberg, and Falko Schappacher\**

Supplementary 1:

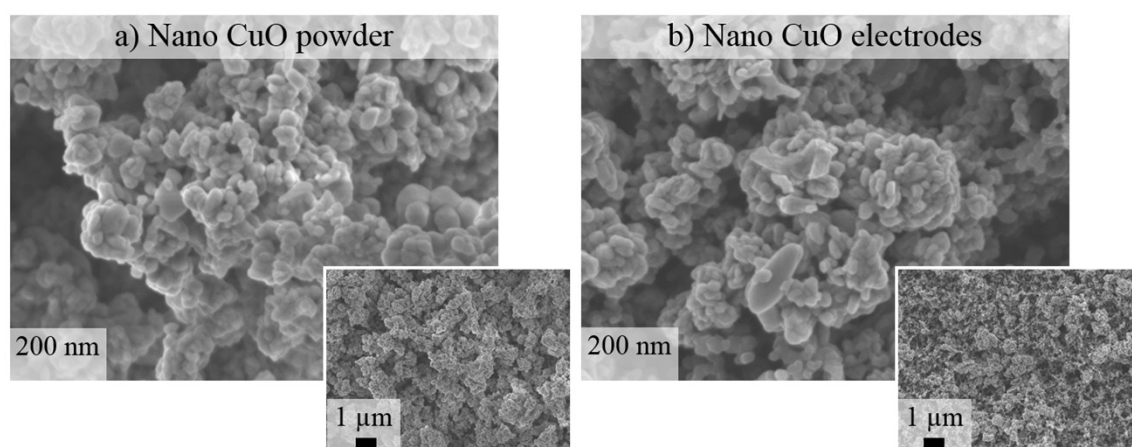

**Figure S1:** (a) and (b) SEM images of the pristine nano CuO particles and the resulting electrodes before cycling. The insets are taken at a magnification of 5,000 times while the other images are taken at a magnification of 10,000 times.

Supplementary 2:

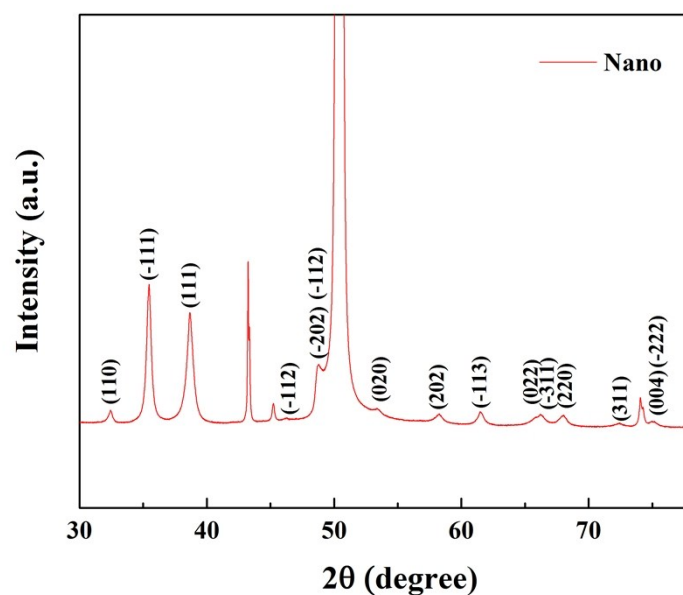

**Figure S2:** XRD pattern of the cast nanocrystalline CuO electrode. The labeled reflections correspond to monoclinic CuO, while the unlabeled reflections correspond to the copper current collector.
